# Supplementary material for: Linggui Zhugan Formula Improves Glucose and Lipid Levels and Alters Gut Microbiota in High-Fat Diet-Induced Diabetic Mice
Source: PubMed Central journal article supplement (PMC6663968; doi:10.3389/fphys.2019.00918), 2019-07-23
Supplement: Data_Sheet_1.pdf [file Data_Sheet_1.pdf]

# S1

Composition of the standard chow diet and the high-fat diet

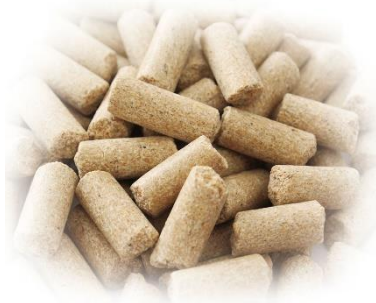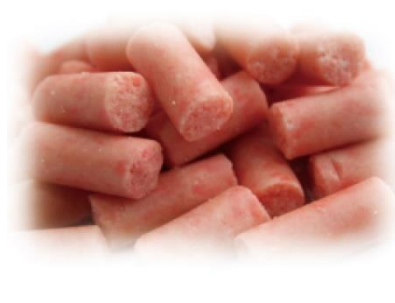

MD12031 (10% Kcal from fat)

MD12033 (60% Kcal from fat)

| Compositions          | MD12031 (10%) | MD12033 (60%) |
|-----------------------|---------------|---------------|
| casein                | 18.96%        | 25.84%        |
| L- cystine            | 0.28%         | 0.39%         |
| cornstarch            | 29.86%        | 0             |
| maltodextrin          | 3.32%         | 16.15%        |
| sucrose               | 33.17%        | 8.89%         |
| cellulose             | 4.74%         | 6.46%         |
| soybean oil           | 2.37%         | 3.23%         |
| lard                  | 1.90%         | 31.66%        |
| compound minerals     | 4.24%         | 5.81%         |
| compound vitamins     | 0.95%         | 1.29%         |
| choline bitartrate    | 0.19%         | 0.26%         |
| total energy (kcal/g) | 3.85          | 5.24          |
