# Supplementary material for: Linggui Zhugan Formula Improves Glucose and Lipid Levels and Alters Gut Microbiota in High-Fat Diet-Induced Diabetic Mice
Source: PubMed Central journal article supplement (PMC6663968; doi:10.3389/fphys.2019.00918), 2019-07-23
Supplement: Data_Sheet_2.pdf [file Data_Sheet_2.pdf]

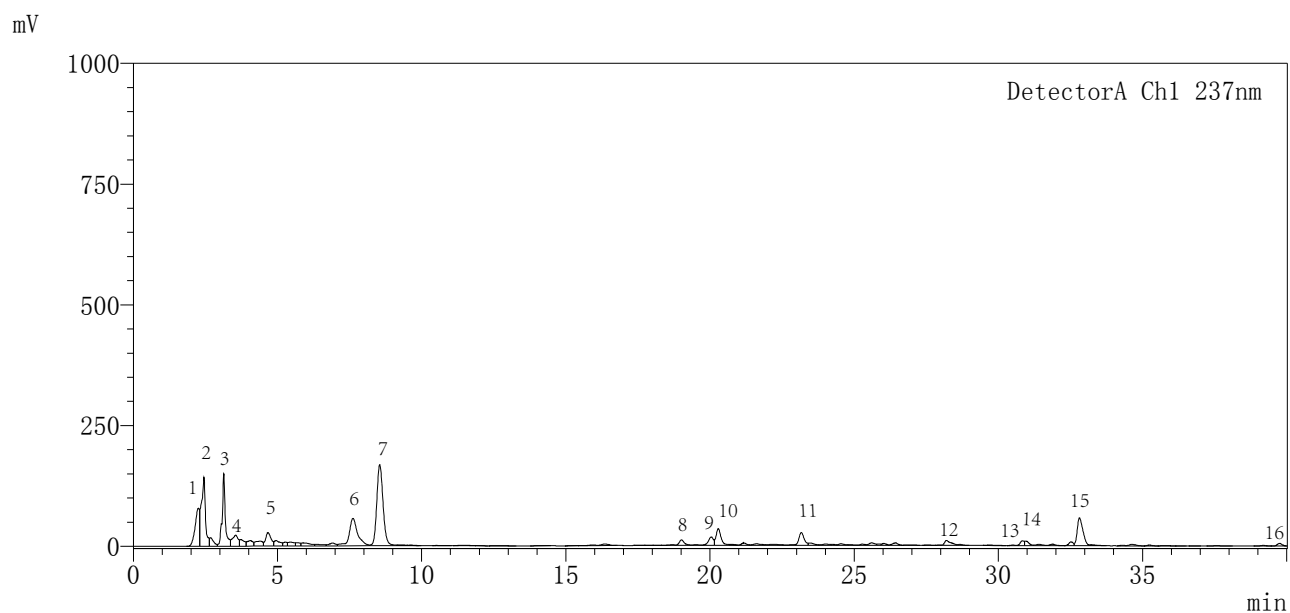

S2 | Fingerprint Chromatogram of Linggui Zhugan. cinnamic acid(6), liquiritin(7), glycyrrhizic acid(15), dehydrotumulosic acid(16).
