# Supplementary material for: Linggui Zhugan Formula Improves Glucose and Lipid Levels and Alters Gut Microbiota in High-Fat Diet-Induced Diabetic Mice
Source: PubMed Central journal article supplement (PMC6663968; doi:10.3389/fphys.2019.00918), 2019-07-23
Supplement: Data_Sheet_3.pdf [file Data_Sheet_3.pdf]

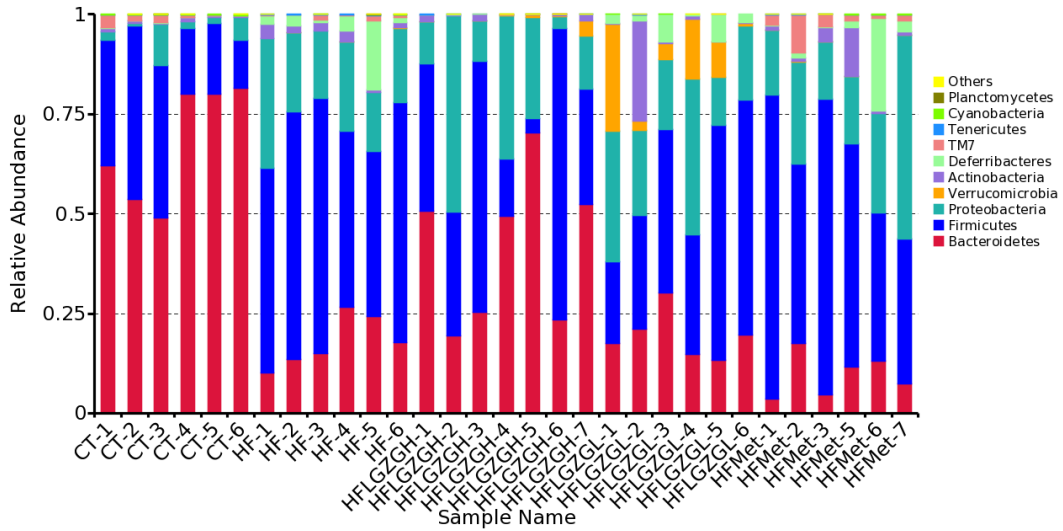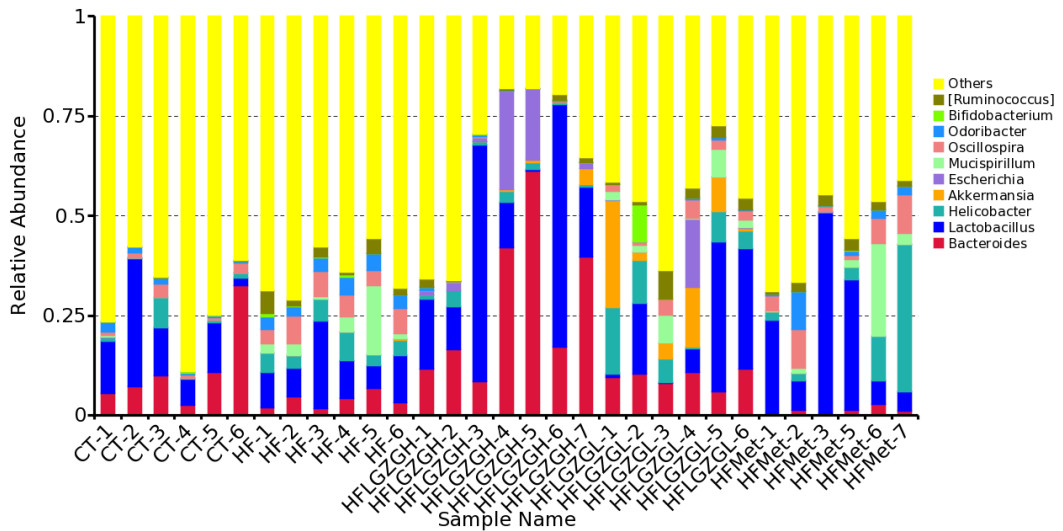

The relative phyla abundance (top 10 detected bacteria) in each sample at the phylum and genus levels
