# Supplementary material for: Linggui Zhugan Formula Improves Glucose and Lipid Levels and Alters Gut Microbiota in High-Fat Diet-Induced Diabetic Mice
Source: PubMed Central journal article supplement (PMC6663968; doi:10.3389/fphys.2019.00918), 2019-07-23
Supplement: Data_Sheet_4.pdf [file Data_Sheet_4.pdf]

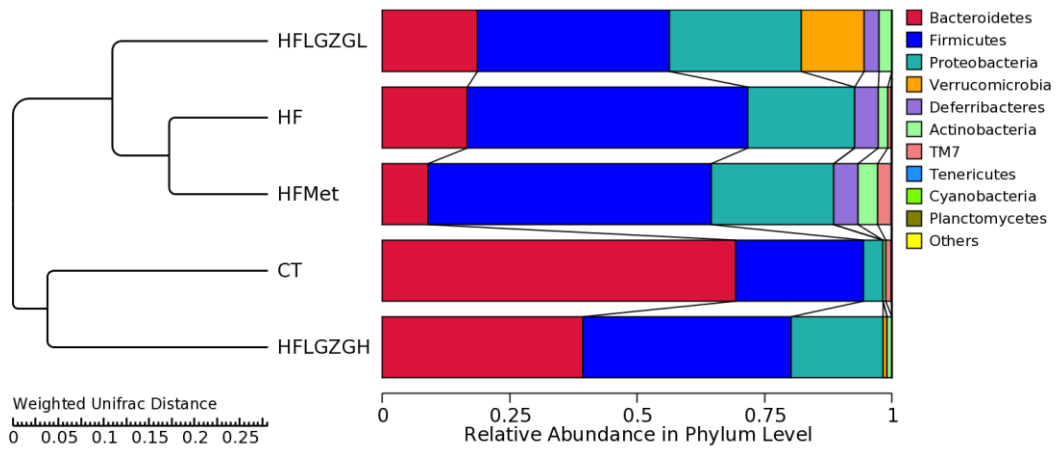

S4 | Clustering tree of the groups using UPGMA (Unweighted Pair-group Method with Arithmetic Mean)
